# Supplementary material
Source: Research Square preprint supplement (doi:10.21203/rs.3.rs-9445274/v1)
Supplement: Supplementary file 1 [file 64519643ddfb0b04bf1215cb.xlsx]

## Sheet: Raw Data
	Part 1							Part 2							Part 3
	Key Performance data							Company Data							Entrepreneurial Opportunity Evaluation				Financial Technology Decision				Risk Re-Categorization				Financing Constraints Alleviation				Information Asymmetry Reduction				Operational Efficiency Incentives
No.	1.1	1.2	1.3	1.4	1.5	1.6	1.7	2.1	2.2	2.3	2.4	2.5	2.6	2.7	3.1	3.2	3.3	3.4	3.5	3.6	3.7	3.8	3.9	3.1	3.11	3.12	3.13	3.14	3.15	3.16	3.17	3.18	3.19	3.2	3.21	3.22	3.23	3.24
1	2	1	1	1	1	1	3	1	5	4	2	2	4	1	4	4	5	5	5	5	5	4	5	4	5	3	4	4	3	4	3	3	3	4	4	4	5	4
2	2	2	2	2	2	1	3	1	3	3	1	3	2	1	4	5	5	5	5	5	4	4	5	5	5	5	5	3	5	5	5	5	3	5	4	4	4	4
3	1	3	2	1	4	2	3	1	3	3	1	4	4	1	5	3	5	4	5	4	3	1	4	4	5	2	2	1	1	4	2	4	5	5	5	5	4	4
4	2	3	2	2	3	3	2	1	1	4	2	2	2	2	4	3	4	3	3	4	4	3	4	4	4	3	3	3	3	5	5	5	2	2	4	3	3	3
5	1	2	2	2	2	2	3	1	1	3	1	4	4	1	5	5	4	4	4	4	3	3	4	5	4	3	3	3	3	4	4	5	4	5	4	5	4	4
6	1	2	1	2	2	2	3	1	1	4	2	4	4	1	5	5	5	5	5	5	3	3	5	5	5	5	5	3	5	5	3	5	5	5	5	5	5	5
7	2	1	1	1	1	1	3	2	1	4	1	1	4	1	4	3	5	5	5	5	5	5	5	5	5	5	5	4	5	4	4	4	4	5	4	4	4	4
8	2	3	1	2	3	2	1	1	4	2	1	3	3	2	4	5	5	5	5	5	4	4	5	5	5	5	4	4	4	5	5	5	5	4	4	5	4	4
9	2	3	2	2	4	4	2	1	4	4	1	4	4	2	4	4	4	4	4	4	4	2	4	4	4	4	4	2	3	4	2	3	3	2	4	4	4	3
10	2	2	2	2	4	2	2	1	4	4	2	3	2	1	4	4	4	4	4	4	3	4	5	5	5	5	3	3	4	5	4	4	5	5	4	5	5	4
11	2	3	2	2	4	3	2	1	1	4	2	3	4	2	5	5	5	5	5	5	5	4	4	5	5	5	5	4	4	5	5	5	5	5	5	5	4	5
12	2	2	2	2	3	2	3	1	3	4	1	3	4	2	4	4	4	4	4	4	4	4	4	4	4	4	4	4	4	4	4	4	4	4	4	4	4	4
13	2	4	1	1	4	4	4	1	4	4	2	4	4	1	4	4	4	4	4	5	4	4	4	4	4	4	4	4	4	4	3	3	4	4	3	4	4	4
14	2	4	2	1	4	3	2	1	1	4	2	0	0	0	4	4	4	3	3	3	3	3	4	4	4	3	3	3	3	4	4	4	4	4	4	4	4	4
15	2	2	1	2	4	2	2	1	1	1	1	3	3	1	3	4	5	5	5	5	3	3	5	5	5	4	5	5	5	5	5	5	5	5	5	5	5	5
16	2	3	1	2	4	3	2	1	1	1	1	3	3	1	4	4	4	4	4	4	4	3	4	4	4	4	4	4	4	4	4	4	4	4	4	4	4	4
17	2	2	22	1	4	4	3	1	1	2	1	3	3	2	4	4	4	4	4	4	4	4	4	4	4	4	4	4	4	4	4	4	4	4	4	4	4	4
18	2	2	2	2	3	4	2	1	1	3	1	3	4	1	4	5	5	4	4	5	3	3	4	5	5	4	5	3	4	5	4	5	5	5	4	4	4	4
19	2	4	1	2	4	4	2	1	1	3	1	3	3	1	3	3	3	4	4	3	1	3	3	3	3	3	3	3	3	4	4	4	3	3	4	4	4	4
20	2	3	2	2	4	4	1	1	1	4	1	3	3	1	4	5	5	4	4	5	4	4	4	5	4	4	4	3	3	3	4	4	4	5	4	4	4	5
21	1	2	1	2	2	2	2	1	3	2	1	3	3	2	2	5	5	5	5	5	2	2	1	5	5	2	4	3	4	4	5	5	3	4	3	2	1	1
22	2	3	2	2	4	3	2	1	1	4	1	3	3	1	4	3	5	4	4	4	4	5	5	5	5	4	4	4	4	4	5	4	4	4	5	5	5	5
23	1	3	1	2	4	3	2	1	1	4	1	4	3	1	4	4	5	4	4	5	4	4	4	4	4	4	3	3	4	4	4	4	4	5	4	3	3	4
24	2	2	1	2	3	2	2	1	1	3	1	3	3	1	3	3	5	4	4	5	4	3	4	4	4	3	3	4	4	4	3	4	4	4	4	4	4	4
25	1	2	2	2	4	4	2	1	1	4	2	3	4	1	4	4	5	4	4	5	4	3	4	4	5	4	4	4	3	5	4	4	5	5	4	5	5	5
26	1	3	2	1	3	2	2	1	1	3	1	3	3	2	3	4	4	4	4	3	3	4	2	4	4	3	4	2	3	4	3	4	3	4	4	3	3	3
27	2	2	1	2	3	4	2	1	4	4	2	3	4	1	5	5	5	5	4	4	3	4	5	5	5	5	4	4	4	4	4	5	4	4	5	5	5	5
28	1	4	2	2	4	4	3	1	1	2	1	4	3	2	5	5	5	4	4	4	3	3	4	4	4	4	4	3	3	4	4	4	3	4	4	4	4	4
29	1	3	2	1	4	4	1	1	4	4	1	3	3	1	5	4	5	5	5	5	5	5	5	5	5	5	5	4	4	5	3	4	4	4	5	5	5	5
30	1	2	2	2	4	4	2	1	1	4	2	3	4	1	4	4	4	4	4	4	4	4	4	4	4	4	4	4	4	4	4	4	4	4	4	4	4	4
31	2	3	1	2	4	4	2	1	4	2	1	3	3	1	5	3	5	3	5	5	5	5	5	5	5	3	3	3	4	4	3	4	4	5	5	5	5	5
32	2	2	2	2	4	2	2	1	3	4	1	3	3	2	5	5	5	5	5	5	5	2	5	5	5	3	3	3	3	5	4	4	4	4	5	5	5	5
